# Supplementary material
Source: Springer Nature journal article supplement (https://www.springermedizin.de/resource/supplementary/12873_2014_207_MOESM2_ESM.pdf/9431648)
Supplement: MOESM2 [file 9431648]

## Assessed for eligibility (N = 390)

### Inclusion Criteria:

- Children and adolescents <18 years
- Treatment in a pediatric emergency department due to alcohol intoxication
- Consent given by participant and parent(s)
- Sufficient mental-cognitive receptiveness

## Enrollment

### Excluded:

- Not meeting inclusion criteria (n= )
- Meeting exclusion criteria (n= )
  - a) Severe injuries as a result of the intoxication
  - b) Cognitive difficulties or language barriers
- Declined to participate (n= )
- Other reasons (n= )

**Randomized (N = 312)** (Stratified cluster randomisation with hospital on a weekend as unit of randomisation)

## Allocation

### Intervention Group

Brief Motivational Intervention, intervention with parents, information on cooperating counseling agencies, telephone-booster after 6 weeks

### Control Group

Treatment as usual (information on negative effects of alcohol use and on cooperating counseling agencies)

## Follow-Up

### Follow up

$t_1$  = 3 months post intervention  
 $t_2$  = 6 months post intervention

### Follow up

$t_1$  = 3 months post intervention  
 $t_2$  = 6 months post intervention
